# Supplementary material
Source: Springer Nature journal article supplement (https://www.springermedizin.de/resource/supplementary/12885_2012_3798_MOESM5_ESM.pdf/9464364)

Identification

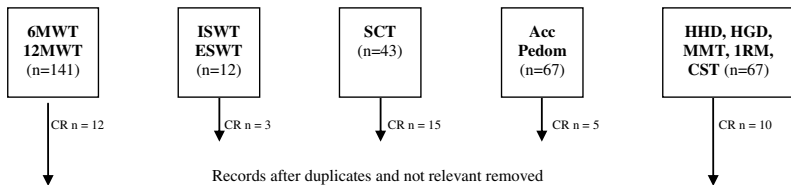

Screening

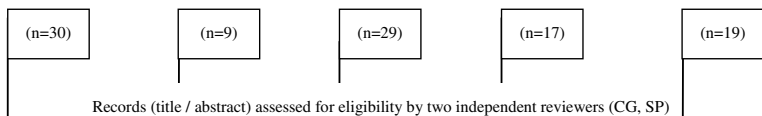

*Excluded (reasons)*

1) Aim not a) to develop OM from S1 or b) to evaluate a measurement property of OM from S1; 2) <5 participants with NSCLC; 3) not full paper in peer review journal; 4) indirect validity; 5) battery measure; 6) paper not in English or available

Eligibility

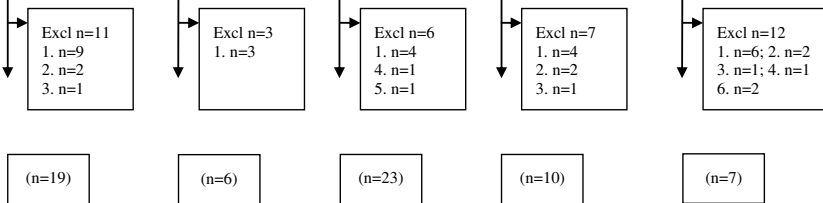

Records (full text) assessed for eligibility by two independent reviewers (CG, SP)

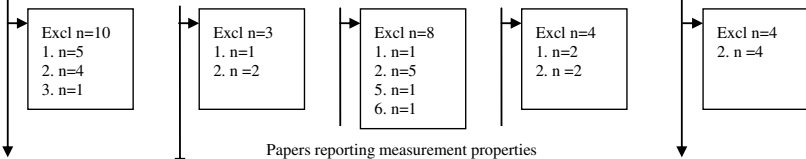

Included

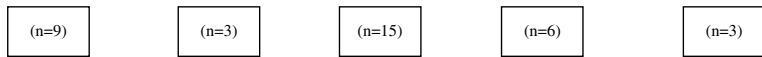

Supplement: MOESM5 [file 9464364]
